# Supplementary material for: Orthostatic hypotension and cerebral small vessel disease: A systematic review
Source: PubMed Central journal article supplement (PMC11563541; doi:10.1177/0271678x241283226), 2024-09-16
Supplement: sj-pdf-1-jcb-10.1177_0271678X241283226.pdf [file sj-pdf-1-jcb-10.1177_0271678X241283226.pdf]

## Supplementary Material

### Appendix A – Search strategy

#### PubMed Session Results (01 Dec 2023)

| Search | Query                                                                                                                                                                                                                                                                                                                                                                                                                                                                                                                                       | Items found |
|--------|---------------------------------------------------------------------------------------------------------------------------------------------------------------------------------------------------------------------------------------------------------------------------------------------------------------------------------------------------------------------------------------------------------------------------------------------------------------------------------------------------------------------------------------------|-------------|
| #3     | #1 AND #2                                                                                                                                                                                                                                                                                                                                                                                                                                                                                                                                   | 945         |
| #2     | "Cerebral Small Vessel Diseases"[Mesh] OR "small vessel*"[tiab] OR "cerebral vascular dis*"[tiab] OR "cerebrovascular dis*"[tiab] OR "cerebro-vascular dis*"[tiab] OR "cerebral vascular dam*"[tiab] OR "cerebrovascular dam*"[tiab] OR "cerebro-vascular dam*"[tiab] OR "white matter hyperintensit*"[tiab] OR "white matter hyper-intensit*"[tiab] OR "WMH"[tiab] OR "fazekas"[tiab] OR "microbleed*"[tiab] OR "micro-bleed*"[tiab] OR "lacune*"[tiab]                                                                                    | 62,310      |
| #1     | "Hypotension, Orthostatic"[Mesh] OR "orthostatic hypoten*"[tiab] OR "postural hypoten*"[tiab] OR "postural intoleran*"[tiab] OR "orthostatic intoleran*"[tiab] OR ((fall[tiab] OR decreas*[tiab] OR dimin*[tiab] OR dipp*[tiab] OR orthostat*[tiab]) AND ("Blood Pressure"[Mesh] OR "blood pressure"[tiab])) OR "postural orthostat*"[tiab] OR "orthostatic collapse*"[tiab] OR "orthostatic insufficien*"[tiab] OR "orthostatic syndrome*"[tiab] OR "orthostatic symptom*"[tiab] OR "orthostatic stress*"[tiab] OR "sudden hypoten*"[tiab] | 139,271     |

#### Embase.com Session Results (01 Dec 2023)

| Search | Query                                                                                                                                                                                                                                                                                                                                                                                                                                                                                                                                                                                         | Items found |
|--------|-----------------------------------------------------------------------------------------------------------------------------------------------------------------------------------------------------------------------------------------------------------------------------------------------------------------------------------------------------------------------------------------------------------------------------------------------------------------------------------------------------------------------------------------------------------------------------------------------|-------------|
| #3     | #1 AND #2                                                                                                                                                                                                                                                                                                                                                                                                                                                                                                                                                                                     | 2,614       |
| #2     | 'cerebrovascular disease'/de OR 'white matter hyperintensity'/exp OR 'small vessel*':ab,ti,kw OR 'cerebral vascular dis*':ab,ti,kw OR 'cerebrovascular dis*':ab,ti,kw OR 'cerebro-vascular dis*':ab,ti,kw OR 'cerebral vascular dam*':ab,ti,kw OR 'cerebrovascular dam*':ab,ti,kw OR 'cerebro-vascular dam*':ab,ti,kw OR 'white matter hyperintensit*':ab,ti,kw OR 'white matter hyper-intensit*':ab,ti,kw OR 'WMH':ab,ti,kw OR 'fazekas':ab,ti,kw OR 'microbleed*':ab,ti,kw OR 'micro-bleed*':ab,ti,kw OR 'lacune*':ab,ti,kw                                                                 | 131,838     |
| #1     | 'orthostatic hypotension'/exp OR 'orthostatic hypoten*':ab,ti,kw OR 'postural hypoten*':ab,ti,kw OR 'postural intoleran*':ab,ti,kw OR 'orthostatic intoleran*':ab,ti,kw OR ((fall:ab,ti,kw OR decreas*':ab,ti,kw OR dimin*':ab,ti,kw OR dipp*':ab,ti,kw OR orthostat*':ab,ti,kw) AND ('blood pressure'/exp OR 'blood pressure':ab,ti,kw)) OR 'postural orthostat*':ab,ti,kw OR 'orthostatic collapse*':ab,ti,kw OR 'orthostatic insufficien*':ab,ti,kw OR 'orthostatic syndrome*':ab,ti,kw OR 'orthostatic symptom*':ab,ti,kw OR 'orthostatic stress*':ab,ti,kw OR 'sudden hypoten*':ab,ti,kw | 239,245     |

### Web of Science (Core Collection) Session Results (01 Dec 2023)

| Search | Query                                                                        | Items found |
|--------|------------------------------------------------------------------------------|-------------|
| #3     | #1 AND #2                                                                    | 1,157       |
| #2     | TS=("small vessel*" OR "cerebral vascular dis*" OR "cerebrovascular dis*" OR | 59,025      |

| Search | Query                                                                                                                                                                                                                                                                                                                                                                                | Items found |
|--------|--------------------------------------------------------------------------------------------------------------------------------------------------------------------------------------------------------------------------------------------------------------------------------------------------------------------------------------------------------------------------------------|-------------|
|        | <p>"cerebro-vascular dis*" OR "cerebral vascular dam*" OR "cerebrovascular dam*" OR "cerebro-vascular dam*" OR "white matter hyperintensit*" OR "white matter hyper-intensit*" OR "WMH" OR "fazekas" OR "microbleed*" OR "micro-bleed*" OR "lacune*")</p>                                                                                                                            |             |
| #1     | <p>TS=("orthostatic hypoten*" OR "postural hypoten*" OR "postural intoleran*" OR "orthostatic intoleran*" OR ((fall OR decreas* OR dimin* OR dipp* OR orthostat*) AND ("blood pressure"))) OR "postural orthostat*" OR "orthostatic collapse*" OR "orthostatic insufficien*" OR "orthostatic syndrome*" OR "orthostatic symptom*" OR "orthostatic stress*" OR "sudden hypoten*")</p> | 100,326     |

Figure 1 – Summary of findings and risk of bias

A. Orthostatic hypotension and white matter hyperintensities

| Author, year                      | Study design                     | Participants                     | Method                                                                | Risk of bias | Association |
|-----------------------------------|----------------------------------|----------------------------------|-----------------------------------------------------------------------|--------------|-------------|
| <b>Buckley et al, 2020</b>        | Cross-sectional                  | Older adults                     | <b>OH:</b> Active standing<br><b>WMH:</b> Scheltens score             |              |             |
| <b>Cui et al, 2020</b>            | Cross-sectional                  | Older adults                     | <b>OH:</b> Home measured OH<br><b>WMH:</b> WMH volume                 |              |             |
| <b>Foster-Dingley et al, 2018</b> | Cross-sectional                  | Older adults                     | <b>OH:</b> Active standing<br><b>WMH:</b> WMH volume                  |              |             |
| <b>Huang et al, 2022</b>          | Cross-sectional                  | Patients with AIS                | <b>OH:</b> Active standing.<br><b>WMH:</b> Fazekas scale              |              |             |
| <b>Ten Harmsen et al, 2017</b>    | Cross-sectional                  | PD patients                      | <b>OH:</b> Active standing<br><b>WMH:</b> Fazekas scale               |              |             |
| <b>Jacob et al, 2022</b>          | Cross-sectional and longitudinal | Older adults                     | <b>OH:</b> Active standing<br><b>WMH:</b> WMH volume                  |              |             |
| <b>Juraschek et al, 2020</b>      | Cross-sectional and longitudinal | Older adults                     | <b>OH:</b> Active standing<br><b>WMH:</b> White matter grade.         |              |             |
| <b>Kario et al, 2002</b>          | Cross-sectional                  | Older hypertensive patients      | <b>OH:</b> Tilt table test,<br><b>WMH:</b> Advanced deep WM lesion    |              |             |
| <b>Oh et al., 2013</b>            | Cross-sectional                  | PD patients                      | <b>OH:</b> Tilt table test<br><b>WMH:</b> Scheltens Score             |              |             |
| <b>Pilleri et al., 2012</b>       | Cross-sectional                  | PD patients and matched controls | <b>OH:</b> Tilt table test<br><b>WMH:</b> Scheltens Score             |              |             |
| <b>Pilotto et al., 2021</b>       | Cross-sectional                  | PD and DLB patients              | <b>OH:</b> Active standing<br><b>WMH:</b> Scheltens scale             |              |             |
| <b>Shin et al, 2021</b>           | Cross-sectional                  | PD patients                      | <b>OH:</b> Tilt table test<br><b>WMH:</b> Fazekas scale               |              |             |
| <b>Soennesyn et al, 2012</b>      | Cross-sectional                  | MCI patients                     | <b>OH:</b> Active standing<br><b>WMH:</b> Scheltens scale, WMH volume |              |             |
| <b>Wiersinga et al, 2023</b>      | Cross sectional                  | Memory clinic patients           | <b>OH:</b> Active standing<br><b>WMH:</b> Fazekas score               |              |             |
| <b>Zimmerman et al., 2020</b>     | Cross sectional                  | Older patients                   | <b>OH:</b> Active standing<br><b>WMH:</b> Fazekas score               |              |             |

Abbreviations: AIS; acute ischemic stroke, DLB; dementia with lewy bodies, MCI; mild cognitive impairment, OH; orthostatic hypotension, PD; Parkinson disease, WMH; white matter hyperintensities

Risk of bias assessment:

- High
- Moderate
- Low

Association

- Association
- No Association

## B. Orthostatic hypotension and lacunes

| Author, year                      | Study design    | Participants           | Method                                                                          | Risk of bias                                                                        | Association                                                                         |
|-----------------------------------|-----------------|------------------------|---------------------------------------------------------------------------------|-------------------------------------------------------------------------------------|-------------------------------------------------------------------------------------|
| <b>Cui et al, 2020</b>            | Cross-sectional | Older adults           | <b>OH:</b> Home measured OH<br><b>Lacunes:</b> Presence of lacunes ( $\geq 1$ ) |  |  |
| <b>Foster-Dingley et al, 2018</b> | Cross-sectional | MCI patients           | <b>OH:</b> Active standing<br><b>Lacunes:</b> Presence of lacunes ( $\geq 1$ )  |  |  |
| <b>Jacob et al, 2022</b>          | Cross-sectional | Older adults           | <b>OH:</b> Active standing<br><b>Lacunes:</b> Presence of lacunes ( $\geq 1$ )  |  |  |
| <b>Wiersinga et al, 2023</b>      | Cross sectional | Memory clinic patients | <b>OH:</b> Active standing<br><b>Lacunes:</b> Presence of lacunes ( $\geq 1$ )  |  |  |

Abbreviations: MCI; mild cognitive impairment, OH; orthostatic hypotension

Risk of bias assessment:

-  High
-  Moderate
-  Low

Association

-  Association
-  No Association

### C. Orthostatic hypotension and microbleeds

| Author, year                      | Study design    | Participants           | Method                                                                  | Risk of bias                                                                        | Association                                                                         |
|-----------------------------------|-----------------|------------------------|-------------------------------------------------------------------------|-------------------------------------------------------------------------------------|-------------------------------------------------------------------------------------|
| <b>Cui et al, 2020</b>            | Cross-sectional | Older adults           | <b>OH:</b> Home measured OH<br><b>Microbleeds:</b> Microbleeds $\geq 1$ |  |  |
| <b>Daida et al, 2018</b>          | Cross-sectional | PD patients            | <b>OH:</b> Active standing<br><b>Microbleeds:</b> Microbleeds $\geq 1$  |  |  |
| <b>Foster-Dingley et al, 2018</b> | Cross-sectional | MCI patients           | <b>OH:</b> Active standing<br><b>Microbleeds:</b> Microbleeds $\geq 1$  |  |  |
| <b>Jacob et al, 2022</b>          | Cross-sectional | Older adults           | <b>OH:</b> Active standing<br><b>Microbleeds:</b> Microbleeds           |  |  |
| <b>Wiersinga et al, 2023</b>      | Cross sectional | Memory clinic patients | <b>OH:</b> Active standing<br><b>Microbleeds:</b> Microbleeds $\geq 3$  |  |  |
| <b>Yamashiro et al., 2015</b>     | Cross-sectional | PD patients            | <b>OH:</b> Active standing<br><b>Microbleeds:</b> Microbleeds $\geq 1$  |  |  |
| <b>Yamashiro et al., 2018</b>     | Cross-sectional | PD patients            | <b>OH:</b> Active standing<br><b>Microbleeds:</b> Microbleeds $\geq 1$  |  |  |

Abbreviations: MCI; mild cognitive impairment, OH; orthostatic hypotension, PD; Parkinson disease

Risk of bias assessment:

-  High
-  Moderate
-  Low

Association

-  Association
-  No Association

Supplemental table 1 - Modified JBI critical appraisal checklist for analytical cross sectional studies

| Questions JBI Risk of bias checklist (modified)                                                                                                                                                                                                                                                                                                                                                                                                                                                                               | Answer options |
|-------------------------------------------------------------------------------------------------------------------------------------------------------------------------------------------------------------------------------------------------------------------------------------------------------------------------------------------------------------------------------------------------------------------------------------------------------------------------------------------------------------------------------|----------------|
| <p>D1. Were the criteria for inclusion in the sample clearly defined?<br/> <i>Yes: Inclusion criteria clearly defined, consecutive enrollment, preferably community-based samples. In patient based samples, inclusion of patients along the disease axis.</i><br/> <i>No: Inclusion criteria are not specified. Excluding patients without valid explanation and/or added value for the study (for example patients with cardiovascular disease, patients with neurogenic OH).</i><br/> <i>Unclear: not applicable.</i></p>  | Yes/no/unclear |
| <p>D2. Were the study subjects and the setting described in detail?<br/> <i>Yes: Clear study setting: Description of the recruitment site of the population (clinic-, outpatient clinic-, community- based), inclusion period, inclusion center, inclusion method.</i><br/> <i>In longitudinal research: Setting of follow-up moment (follow-up time frame, reach out procedure, data collection method).</i><br/> <i>No: Study subjects and setting not sufficiently specified.</i><br/> <i>Unclear: not applicable.</i></p> | Yes/no/unclear |
| <p>D3. Was the exposure measured in a valid and reliable way?<br/> <i>Yes: OH measured using active standing or tilt table test, after supine or seated rest of at least three minutes.</i><br/> <i>No: OH measurement method unclear, not sufficient rest period before measurement.</i><br/> <i>Unclear: Measurement unclear.</i></p>                                                                                                                                                                                       | Yes/no/unclear |
| <p>D4. Were objective, standard criteria used for measurement of the condition?<br/> <i>Yes: OH using consensus definition, measured within 3 minutes of standing up/tilting to at least 60 °C.</i><br/> <i>No: Not using consensus definition: for example OH measurement later than three minutes, diagnosis based on complaints.</i><br/> <i>Unclear: OH criteria unclear.</i></p>                                                                                                                                         | Yes/no/unclear |
| <p>D5. Were confounding factors identified?<br/> <i>Yes: Identification of following confounding factors: age, sex, systolic blood pressure, OH-inducing medication and to lesser extent cardiovascular disease, diabetes and, neurological disease (PD/DLB).</i><br/> <i>No: Important confounders not identified and/or presented.</i><br/> <i>Unclear: Unclear if confounding factors are identified.</i></p>                                                                                                              | Yes/no/unclear |
| <p>D6. Were strategies to deal with confounding factors stated?<br/> <i>Yes: Analyses adjusted for important confounding factors (see above).</i><br/> <i>No: Unadjusted analyses.</i><br/> <i>Unclear: Adjustment unclear.</i></p>                                                                                                                                                                                                                                                                                           | Yes/no/unclear |
| <p>D7. Were the outcomes measured in a valid and reliable way?<br/> <i>Yes: CSVD measured with MRI or CT, using validated measurement tools, assessment by trained professional(s) blinded for OH status.</i><br/> <i>No: Unvalidated measurement tool, professional(s) not blinded.</i><br/> <i>Unclear: Assessment unclear.</i></p>                                                                                                                                                                                         | Yes/no/unclear |
| <p>D8. Was appropriate statistical analysis used?</p>                                                                                                                                                                                                                                                                                                                                                                                                                                                                         | Yes/no/unclear |

|                                                                                                                                                                                                                                                                                                                                                                                                                                                                                                                                                    |  |
|----------------------------------------------------------------------------------------------------------------------------------------------------------------------------------------------------------------------------------------------------------------------------------------------------------------------------------------------------------------------------------------------------------------------------------------------------------------------------------------------------------------------------------------------------|--|
| <p><i>Yes: Statistical analysis of association includes logistic/linear regression analysis or ANCOVA, adjusted for important confounding factors (see above).<br/>Cross-sectional data: Missing data &lt;5%, otherwise imputed.<br/>For longitudinal studies: Information on re-examination, loss to follow-up &lt;=20%.</i></p> <p><i>No: Percentage and t-test, other. Cross-sectional missing data &gt;5% and not imputed or overall &gt;25%. Longitudinal missing data &gt; 20%.</i></p> <p><i>Unclear: Statistical analysis unclear.</i></p> |  |
|----------------------------------------------------------------------------------------------------------------------------------------------------------------------------------------------------------------------------------------------------------------------------------------------------------------------------------------------------------------------------------------------------------------------------------------------------------------------------------------------------------------------------------------------------|--|

Abbreviations: ANCOVA; Analysis of covariance, CSVD; cerebral small vessel disease, CT; computer tomography, DLB; Dementia with Lewy bodies, JBI; Johanna Briggs institute MRI; magnetic resonance imaging, OH: orthostatic hypotension, PD; Parkinson disease
